# Supplementary material for: Molecular targets and anticancer activity of quinoline–chalcone hybrids: literature review
Source: PubMed Central journal article supplement — RSC Adv. 2020 Aug 21;10(52):31139–55. doi: 10.1039/d0ra05594h (PMC9056499; doi:10.1039/d0ra05594h), 2020-08-21
Supplement: RA-010-D0RA05594H-s001.pdf [file RA-010-D0RA05594H-s001.pdf]

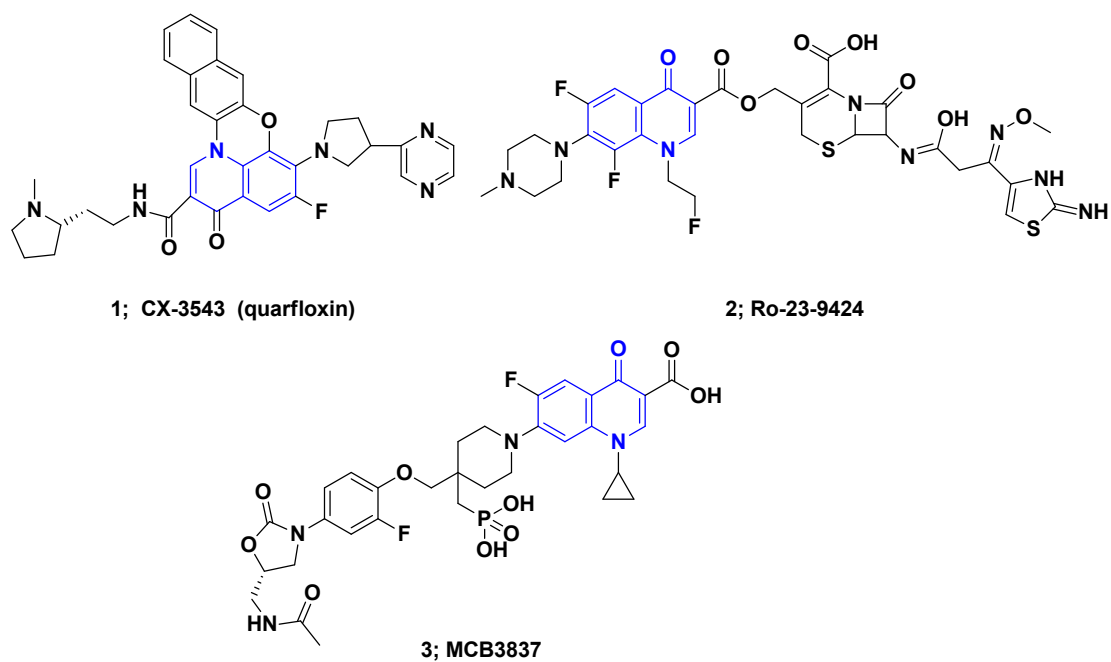

**Fig. 1:** Chemical structures of CX-3543 (quarfloxin), Ro-23-9424 and MCB3837.

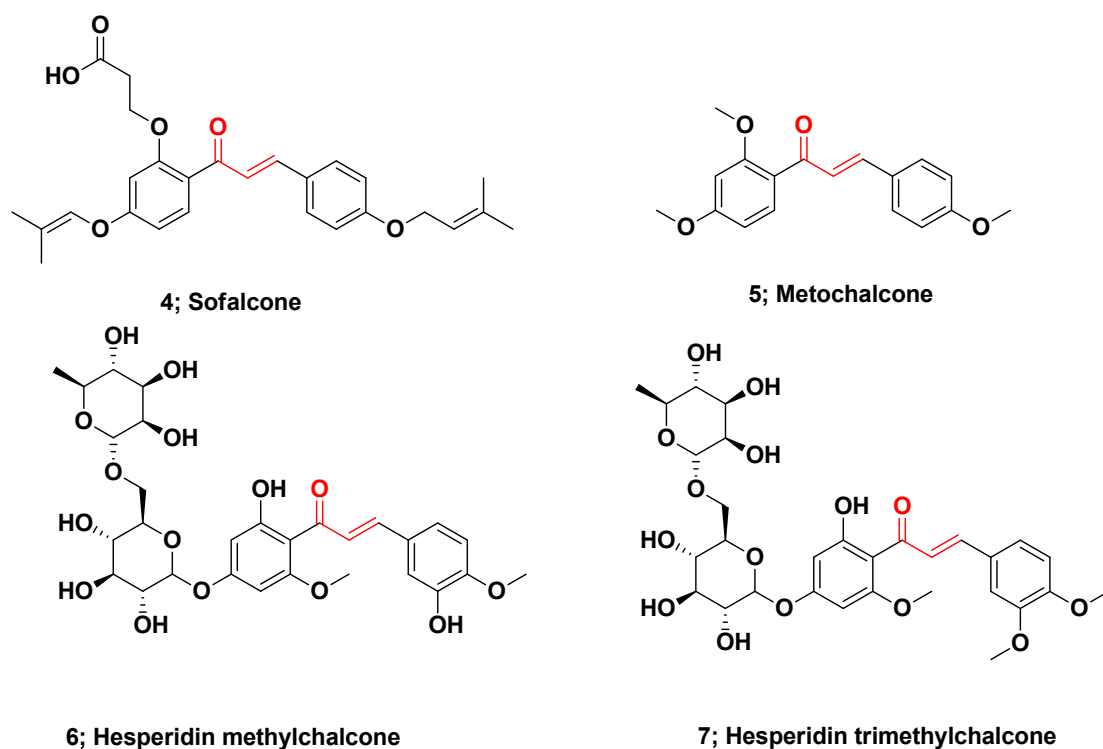

**Fig. 2:** Chemical structures of approved and clinically tested naturally occurring chalcones.

**Table 1: Examples of anticancer chalcones<sup>1</sup>**

| Chalcone derivative                                                                                                  | Target                                    | Chalcone derivative                                                                                                | Target                     |
|----------------------------------------------------------------------------------------------------------------------|-------------------------------------------|--------------------------------------------------------------------------------------------------------------------|----------------------------|
| 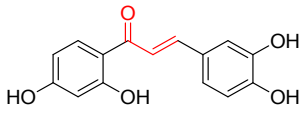 <p><b>8; Butein</b></p>            | EGFR, IKK $\beta$ ,<br>aromatase,<br>HDAC |  <p><b>11; Xanthohumol</b></p>   | IKK $\beta$ ,<br>aromatase |
|  <p><b>9; Isoliquiritigenin</b></p> | EGFR                                      |  <p><b>12; Xanthoangelol</b></p> | Aurora<br>kinases,<br>EGFR |
|  <p><b>10; Licochalcone A</b></p>   | IKK $\beta$                               |                                                                                                                    |                            |

**Table 2: Examples of anticancer quinolines**

| Compound                                                                                                           | Target                                                                         | Compound                                                                                                           | Target                                                                  |
|--------------------------------------------------------------------------------------------------------------------|--------------------------------------------------------------------------------|--------------------------------------------------------------------------------------------------------------------|-------------------------------------------------------------------------|
| 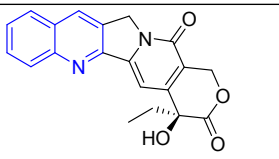 <p><b>13, Camptothecin</b></p> | Topoisomerase I<br>and II inhibitor <sup>2</sup>                               |  <p><b>28</b></p>              | Poly(ADP-ribose)<br>polymerase-1 (PARP-1)<br>inhibitors <sup>3</sup>    |
|  <p><b>14</b></p>               | G-quadruplex-DNA<br>binding<br>affinity <sup>4</sup>                           |  <p><b>29; DK8G557</b></p>     | PI3-kinase related<br>kinase (PIKK) and<br>mTOR inhibitors <sup>5</sup> |
|  <p><b>15</b></p>               | Anti-mitotic agents<br>and tubulin<br>polymerization<br>inhibitor <sup>6</sup> |  <p><b>2; Cabozantinib</b></p> | Protein kinase<br>inhibitor <sup>7</sup>                                |

|                                                                                                                                                  |                                                            |                                                                                                                                               |                                                                                       |
|--------------------------------------------------------------------------------------------------------------------------------------------------|------------------------------------------------------------|-----------------------------------------------------------------------------------------------------------------------------------------------|---------------------------------------------------------------------------------------|
| 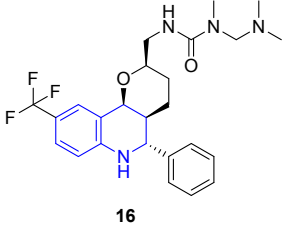 <p style="text-align: center;"><b>16</b></p>                   | Mitotic kinesin-5 inhibitor <sup>8</sup>                   |  <p style="text-align: center;"><b>30</b></p>               | Protein phosphatase Cdc25 inhibitors <sup>9</sup>                                     |
|  <p style="text-align: center;"><b>17</b></p>                   | DNA intercalating agent <sup>10</sup>                      |  <p style="text-align: center;"><b>31</b></p>               | Bcl-2 family protein modulators <sup>11, 12</sup>                                     |
|  <p style="text-align: center;"><b>18; Brequinar sodium</b></p> | De novo pyrimidine biosynthesis inhibitor <sup>13-15</sup> |  <p style="text-align: center;"><b>32</b></p>               | STAT3 (signal transducers and activators of transcription 3) inhibitors <sup>16</sup> |
|  <p style="text-align: center;"><b>19</b></p>                 | Thymidylate synthase inhibitor <sup>17</sup>               |  <p style="text-align: center;"><b>33</b></p>             | NAD(P)H:quinone oxidoreductase (hNQO1) substrates <sup>18</sup>                       |
|  <p style="text-align: center;"><b>20</b></p>                 | Iron chelators <sup>19, 20</sup>                           |  <p style="text-align: center;"><b>34</b></p>             | FGF-R2 autophosphorylation inhibitors <sup>21</sup>                                   |
|  <p style="text-align: center;"><b>21</b></p>                 | Carbonic anhydrase inhibitors <sup>22</sup>                |  <p style="text-align: center;"><b>35; Clioquinol</b></p> | NF-kappa B inhibitor <sup>23-25</sup>                                                 |

|                                                                                                                    |                                                                        |                                                                                                                   |                                                                                                |
|--------------------------------------------------------------------------------------------------------------------|------------------------------------------------------------------------|-------------------------------------------------------------------------------------------------------------------|------------------------------------------------------------------------------------------------|
| 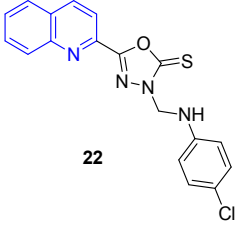 <p><b>22</b></p>                 | <p>Telomerase inhibitors<sup>26</sup></p>                              |  <p><b>36</b></p>               | <p>Hsp90 inhibitors<sup>27</sup></p>                                                           |
|  <p><b>23</b></p>                 | <p>Androgen receptor antagonists<sup>28</sup></p>                      |  <p><b>37; Quinidine</b></p>     | <p>Histone H4 hyperacetylation inducer<sup>29</sup></p>                                        |
|  <p><b>39</b></p>                 | <p>Aromatase inhibitor<sup>30</sup></p>                                |  <p><b>38</b></p>               | <p>Histone acetyltransferases (HAT) and histone deacetylase (HDAC) inhibitors<sup>31</sup></p> |
|  <p><b>24</b></p>                | <p>Progesterone receptor agonists<sup>32</sup></p>                     |  <p><b>39</b></p>              | <p>Hedgehog signaling inhibitors<sup>33</sup></p>                                              |
|  <p><b>25; NQ</b></p>           | <p>Free-radical regulators and ROS mediated apoptosis<sup>34</sup></p> |  <p><b>40</b></p>             | <p>Human tankyrases inhibitor<sup>35, 36</sup></p>                                             |
|  <p><b>26</b></p>               | <p>Sirtuin inhibitors<sup>37</sup></p>                                 |  <p><b>41; Tipifarnib</b></p> | <p>Farnesyltransferase inhibitor (FTI)<sup>38, 39</sup></p>                                    |
|  <p><b>27; Ammosamide B</b></p> | <p>Quinone reductase 2 inhibitor<sup>40</sup></p>                      |  <p><b>42; FPA-137</b></p>     | <p>Proteasome inhibitors<sup>41</sup></p>                                                      |

|  |  |  |  |
|--|--|--|--|
|  |  |  |  |
|--|--|--|--|

## References

1. B. Zhou and C. Xing, *Medicinal chemistry*, 2015, **5**, 388.
2. M. R. Redinbo, L. Stewart, P. Kuhn, J. J. Champoux and W. G. Hol, *Science (New York, N.Y.)*, 1998, **279**, 1504-1513.
3. A.-M. Lord, M. F. Mahon, M. D. Lloyd and M. D. Threadgill, *Journal of medicinal chemistry*, 2009, **52**, 868-877.
4. J. Lavrado, A. P. Reszka, R. Moreira, S. Neidle and A. Paulo, *Bioorganic & medicinal chemistry letters*, 2010, **20**, 7042-7045.
5. H. Peng, D.-I. Kim, J. N. Sarkaria, Y.-S. Cho, R. T. Abraham and L. H. Zalkow, *Bioorganic & medicinal chemistry*, 2002, **10**, 167-174.
6. Y. Xia, Z.-Y. Yang, P. Xia, T. Hackl, E. Hamel, A. Mauger, J.-H. Wu and K.-H. Lee, *Journal of medicinal chemistry*, 2001, **44**, 3932-3936.
7. T. K. Choueiri, S. Halabi, B. L. Sanford, O. Hahn, M. D. Michaelson, M. K. Walsh, D. R. Feldman, T. Olencki, J. Picus and E. J. Small, *Journal of Clinical Oncology*, 2017, **35**, 591.
8. K. Schiemann, D. Finsinger, F. Zenke, C. Amendt, T. Knöchel, D. Bruge, H.-P. Buchstaller, U. Emde, W. Stähle and S. Anzali, *Bioorganic & medicinal chemistry letters*, 2010, **20**, 1491-1495.
9. J. S. Lazo, D. C. Aslan, E. C. Southwick, K. A. Cooley, A. P. Ducruet, B. Joo, A. Vogt and P. Wipf, *Journal of medicinal chemistry*, 2001, **44**, 4042-4049.
10. A. Esparza-Ruiz, C. Herrmann, J. Chen, B. O. Patrick, E. Polishchuk and C. Orvig, *Inorganica Chimica Acta*, 2012, **393**, 276-283.
11. E. Saugues, L. Nauton, V. Théry, F. Anizon and P. Moreau, *Bioorganic chemistry*, 2011, **39**, 143-150.
12. E. Saugues, A.-L. Debaud, F. Anizon, N. Bonnefoy and P. Moreau, *European journal of medicinal chemistry*, 2012, **57**, 112-125.
13. D. L. Dexter, D. P. Hesson, R. J. Ardecky, G. V. Rao, D. L. Tippet, B. A. Dusak, K. D. Paull, J. Plowman, B. M. DeLarco and V. Narayanan, *Cancer research*, 1985, **45**, 5563-5568.
14. S.-F. Chen, R. L. Ruben and D. L. Dexter, *Cancer research*, 1986, **46**, 5014-5019.
15. G. Peters, S. Sharma, E. Laurensse and H. Pinedo, *Investigational new drugs*, 1987, **5**, 235-244.
16. H. Chen, Z. Yang, C. Ding, L. Chu, Y. Zhang, K. Terry, H. Liu, Q. Shen and J. Zhou, *European journal of medicinal chemistry*, 2013, **62**, 498-507.
17. P. Warner, A. J. Barker, A. L. Jackman, K. D. Burrows, N. Roberts, J. A. Bishop, B. M. O'Connor and L. R. Hughes, *Journal of medicinal chemistry*, 1992, **35**, 2761-2768.
18. C. M. Keyari, A. K. Kearns, N. S. Duncan, E. A. Eickholt, G. Abbott, H. D. Beall and P. Diaz, *Journal of medicinal chemistry*, 2013, **56**, 3806-3819.
19. M. Whitnall, J. Howard, P. Ponka and D. R. Richardson, *Proceedings of the National Academy of Sciences*, 2006, **103**, 14901-14906.

20. M. Serda, D. S. Kalinowski, A. Mrozek-Wilczkiewicz, R. Musiol, A. Szurko, A. Ratuszna, N. Pantarat, Z. Kovacevic, A. M. Merlot and D. R. Richardson, *Bioorganic & medicinal chemistry letters*, 2012, **22**, 5527-5531.
21. T. Shimizu, Y. Fujiwara, T. Osawa, T. Sakai, K. Kubo, K. Kubo, T. Nishitoba, K. Kimura, T. Senga and H. Murooka, *Bioorganic & medicinal chemistry letters*, 2004, **14**, 875-879.
22. M. M. Ghorab, F. A. Ragab, H. I. Heiba, R. K. Arafa and E. M. El-Hossary, *European journal of medicinal chemistry*, 2010, **45**, 3677-3684.
23. W.-Q. Ding, B. Liu, J. L. Vaught, H. Yamauchi and S. E. Lind, *Cancer research*, 2005, **65**, 3389-3395.
24. T. Du, G. Filiz, A. Caragounis, P. J. Crouch and A. R. White, *Journal of Pharmacology and Experimental Therapeutics*, 2008, **324**, 360-367.
25. X. Mao, X. Li, R. Sprangers, X. Wang, A. Venugopal, T. Wood, Y. Zhang, D. Kuntz, E. Coe and S. Trudel, *Leukemia*, 2009, **23**, 585-590.
26. J. Sun, H. Zhu, Z.-M. Yang and H.-L. Zhu, *European journal of medicinal chemistry*, 2013, **60**, 23-28.
27. T. Ganesh, J. Min, P. Thepchatri, Y. Du, L. Li, I. Lewis, L. Wilson, H. Fu, G. Chiosis and R. Dingledine, *Bioorganic & medicinal chemistry*, 2008, **16**, 6903-6910.
28. L. G. Hamann, R. I. Higuchi, L. Zhi, J. P. Edwards, X.-N. Wang, K. B. Marschke, J. W. Kong, L. J. Farmer and T. K. Jones, *Journal of medicinal chemistry*, 1998, **41**, 623-639.
29. Q. Zhou, Z. K. Melkounian, A. Lucktong, M. Moniwa, J. R. Davie and J. S. Strobl, *Journal of Biological Chemistry*, 2000, **275**, 35256-35263.
30. A. Maiti, P. N. Reddy, M. Sturdy, L. Marler, S. D. Pegan, A. D. Mesecar, J. M. Pezzuto and M. Cushman, *Journal of medicinal chemistry*, 2009, **52**, 1873-1884.
31. P. W. Finn, I. Kalvinsh, E. Loza, V. Andrianov, O. Habarova, D. Lolya and I. Piskunova, Google Patents, 2011.
32. L. Zhi, C. M. Tegley, B. Pio, J. P. Edwards, M. Motamedi, T. K. Jones, K. B. Marschke, D. E. Mais, B. Risek and W. T. Schrader, *Journal of medicinal chemistry*, 2003, **46**, 4104-4112.
33. T. Ohashi, Y. Oguro, T. Tanaka, Z. Shiokawa, S. Shibata, Y. Sato, H. Yamakawa, H. Hattori, Y. Yamamoto and S. Kondo, *Bioorganic & medicinal chemistry*, 2012, **20**, 5496-5506.
34. H. Jiang, J. E. Taggart, X. Zhang, D. M. Benbrook, S. E. Lind and W.-Q. Ding, *Cancer letters*, 2011, **312**, 11-17.
35. A. Hakmé, H. K. Wong, F. Dantzer and V. Schreiber, *EMBO reports*, 2008, **9**, 1094-1100.
36. M. Narwal, H. Venkannagari and L. Lehtiö, *Journal of medicinal chemistry*, 2012, **55**, 1360-1367.
37. N. Mulakayala, D. Rambabu, M. R. Raja, M. Chaitanya, C. S. Kumar, A. M. Kalle, G. R. Krishna, C. M. Reddy, M. B. Rao and M. Pal, *Bioorganic & medicinal chemistry*, 2012, **20**, 759-768.
38. D. W. End, G. Smets, A. V. Todd, T. L. Applegate, C. J. Fuery, P. Angibaud, M. Venet, G. Sanz, H. Poignet and S. Skrzat, *Cancer research*, 2001, **61**, 131-137.
39. R. Kurzrock, M. Albitar, J. E. Cortes, E. H. Estey, S. H. Faderl, G. Garcia-Manero, D. A. Thomas, F. J. Giles, M. E. Ryback and A. Thibault, *Journal of clinical oncology*, 2004, **22**, 1287-1292.
40. P. N. Reddy, K. C. Jensen, A. D. Mesecar, P. E. Fanwick and M. Cushman, *Journal of medicinal chemistry*, 2012, **55**, 367-377.
41. S. Adsule, V. Barve, D. Chen, F. Ahmed, Q. P. Dou, S. Padhye and F. H. Sarkar, *Journal of medicinal chemistry*, 2006, **49**, 7242-7246.
